# Supplementary material
Source: PubMed Central journal article supplement (PMC7654718)
Supplement: NIHMS1564812-supplement-3.pdf [file NIHMS1564812-supplement-3.pdf]

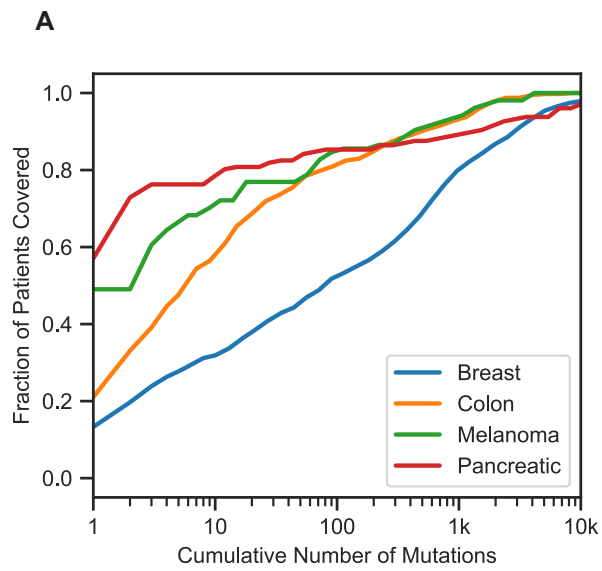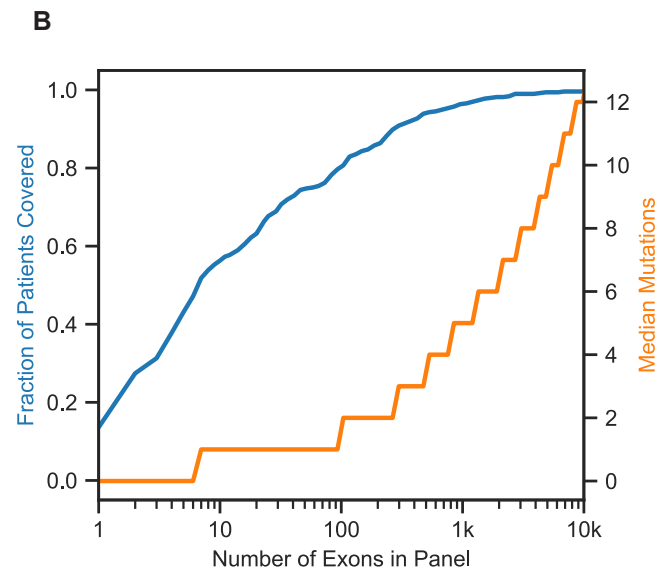

**Supplementary Figure 1: Analysis of recurrently mutated genes.** (A) Fraction of patients covered using the most frequent mutations in each cancer cohort. (B) Gene panel performance using TCGA breast cancer data.
