# Supplementary material
Source: PubMed Central journal article supplement (PMC7654718)
Supplement: NIHMS1564812-supplement-4.pdf [file NIHMS1564812-supplement-4.pdf]

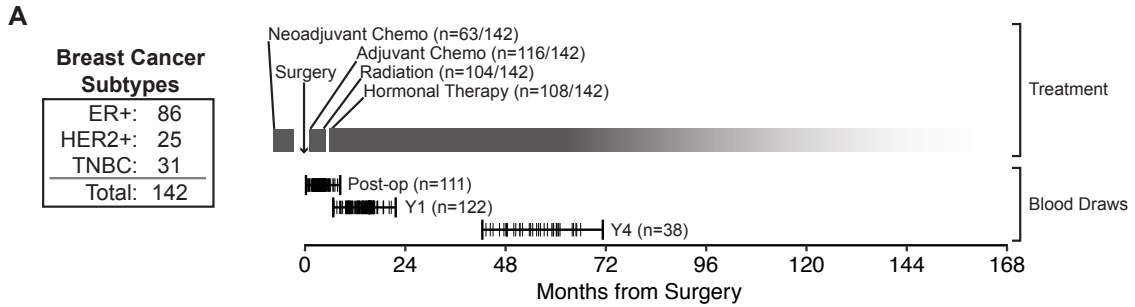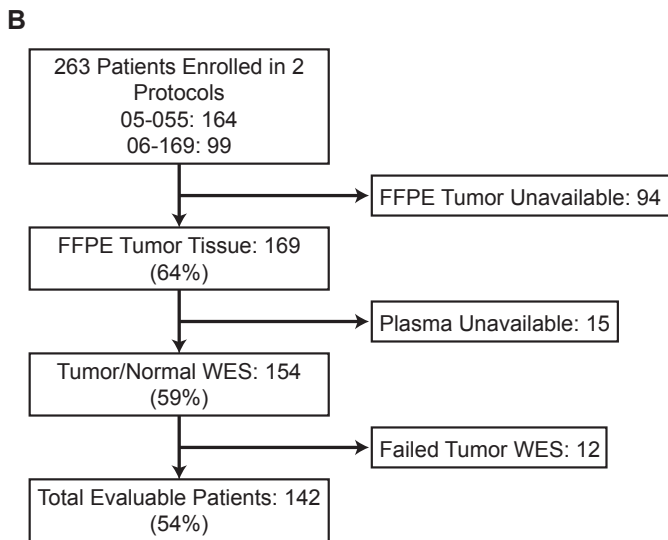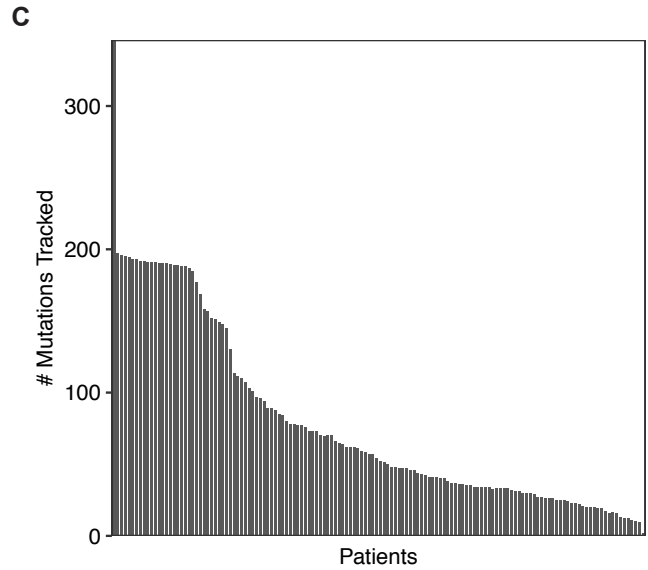

**Supplementary Figure 2: Early stage breast cancer cohort.** (A) Overview of subtype distribution of cohort as well as the timing of blood draws relative to surgery and treatment. (B) REMARK diagram of the early stage breast cancer cohort. (C) Distribution of the number of mutations tracked for each patient.
