# Supplementary material
Source: PubMed Central journal article supplement (PMC7654718)
Supplement: NIHMS1564812-supplement-5.pdf [file NIHMS1564812-supplement-5.pdf]

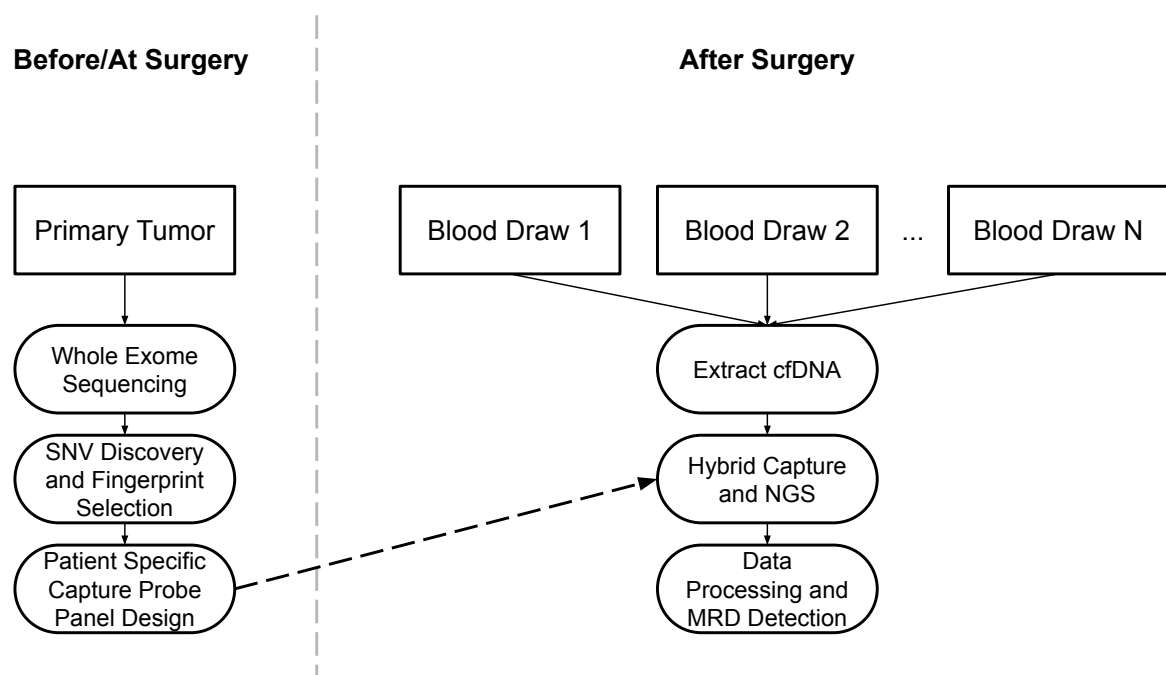

**Supplementary Figure 3: Overview schematic of MRD assay.** MRD assay workflow from characterizing a primary tumor to determining if a blood draw contains evidence of residual disease.
