# Supplementary material
Source: PubMed Central journal article supplement (PMC7654718)
Supplement: NIHMS1564812-supplement-6.pdf [file NIHMS1564812-supplement-6.pdf]

**A**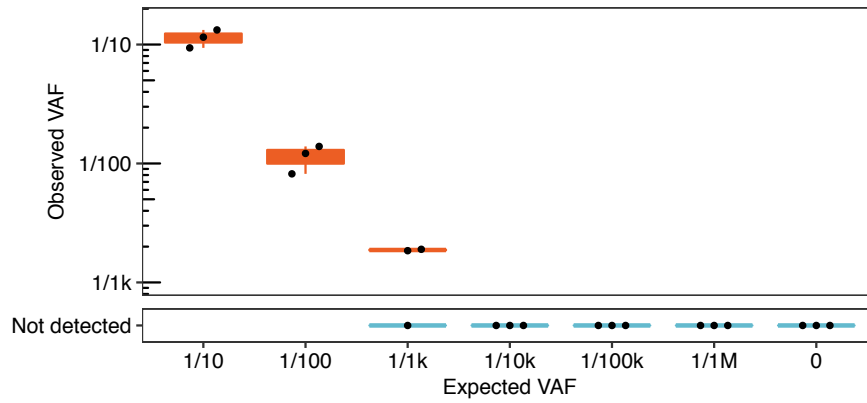**B**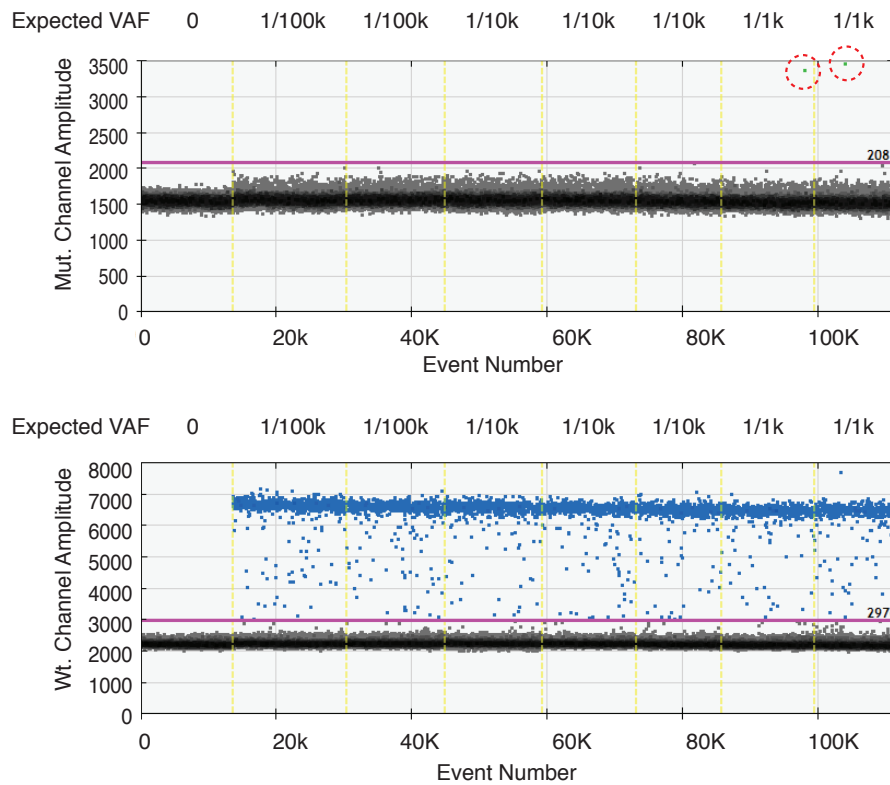

**Supplementary Figure 4: Digital droplet PCR (ddPCR) testing for single mutation in dilution series.** (A) The observed VAFs of HapMap serial dilutions measured by using a ddPCR assay for a single mutation (with three replicates) vs. the expected VAFs; (B) The representative ddPCR raw data and fluorescence intensity thresholds for determining positive or negative droplets.
