# Supplementary material
Source: PubMed Central journal article supplement (PMC7654718)
Supplement: NIHMS1564812-supplement-7.pdf [file NIHMS1564812-supplement-7.pdf]

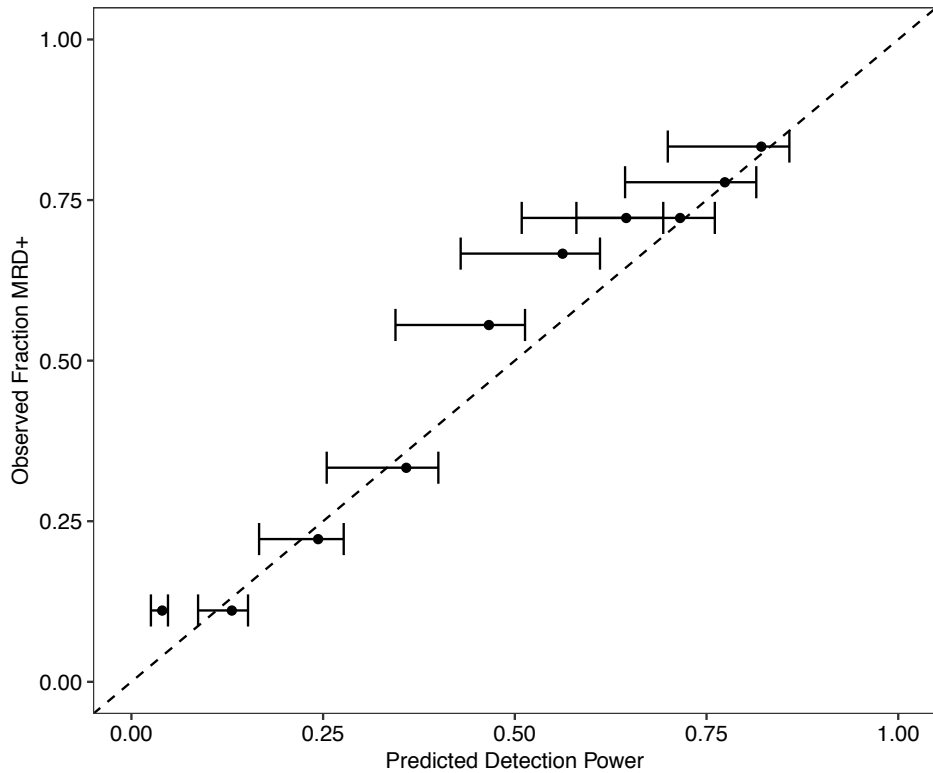

**Supplementary Figure 5: Verification of detection power calculation.** Comparison between the predicted detection power of 18 replicates and the actual fraction of those replicates that were called MRD+. 18 independent samples from a 1:100k dilution were probed with a 488 SNV panel (see methods). Replicates had their duplex consensus reads downsampled in increments of 10% and detection power was recalculated. Reported are the median and range of predicted detection powers for all replicates at each downsampling.
