# Supplementary material
Source: PubMed Central journal article supplement (PMC7654718)
Supplement: NIHMS1564812-supplement-8.pdf [file NIHMS1564812-supplement-8.pdf]

**A**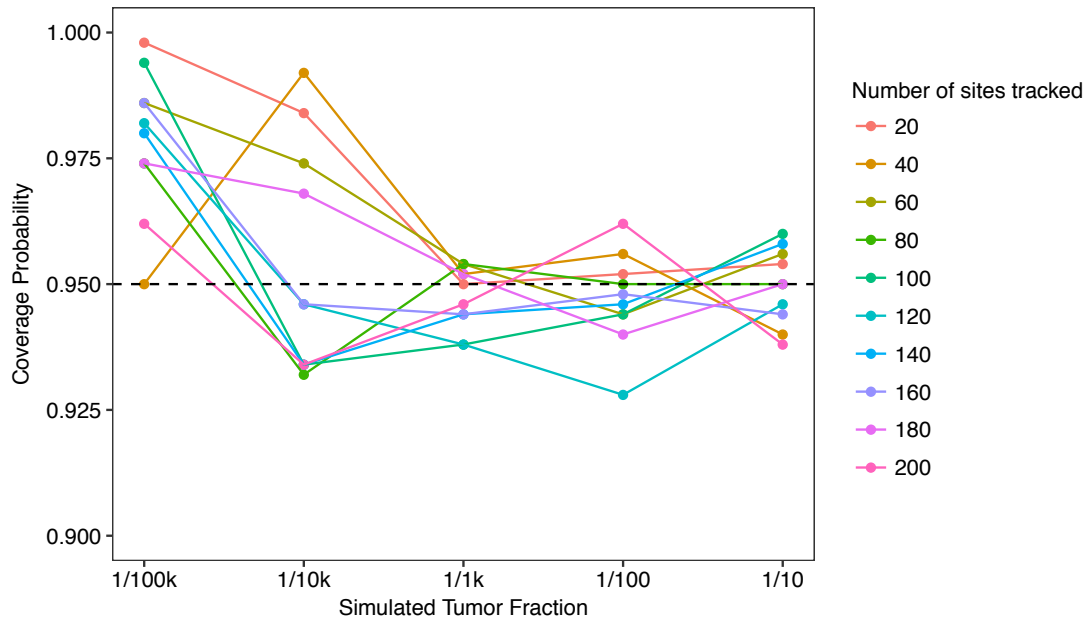**B**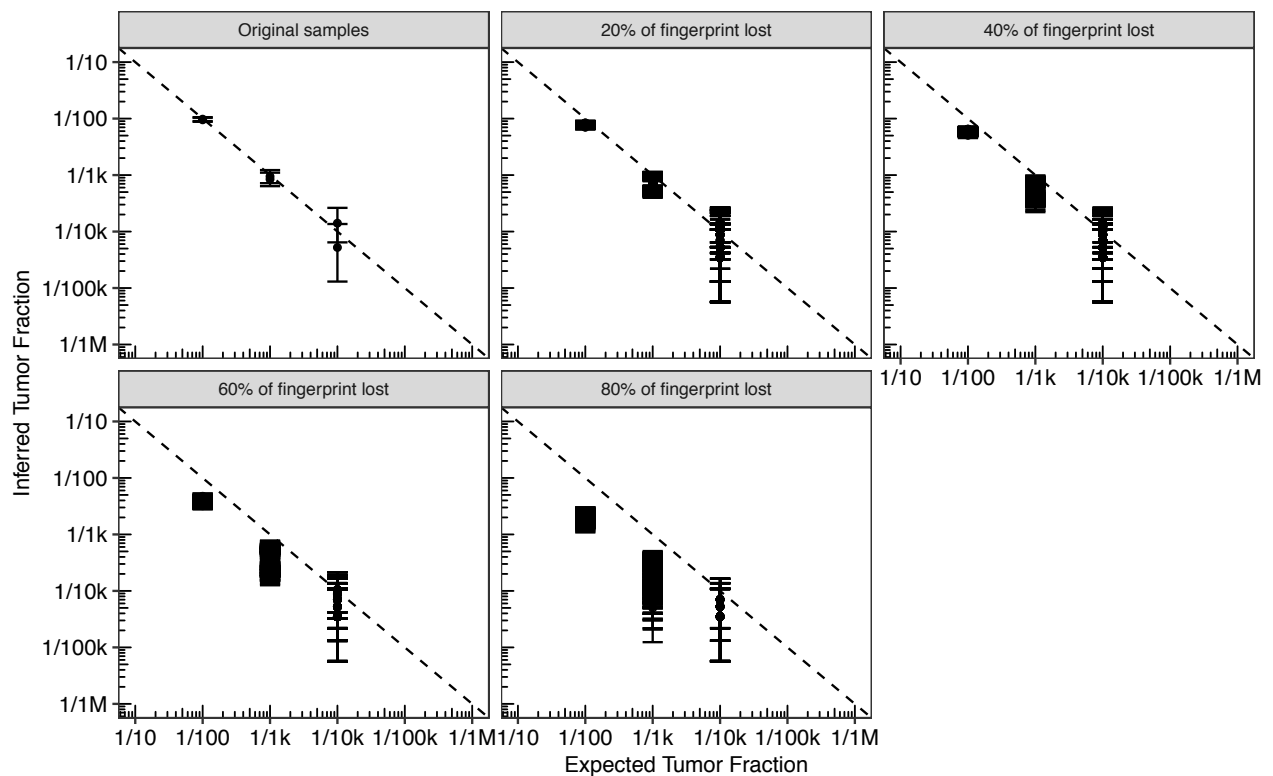

**Supplementary Figure 6: Validation of tumor fraction confidence interval and effects of biological variability on tumor fraction inference.** (A) Confidence intervals inferred from simulated data were aggregated into coverage probability for each condition and compared against theoretical coverage probability of 95% (see Methods). (B) Biological variability of clonal evolution loss was simulated by removing tumor evidence from a fraction of the fingerprint panel. Tumor fraction was calculated for simulated and original samples for comparison.
