# Supplementary material
Source: PubMed Central journal article supplement (PMC7654718)
Supplement: NIHMS1564812-supplement-10.pdf [file NIHMS1564812-supplement-10.pdf]

**Patient MRD Panels (# mutations tracked)**

|                                | <b>A</b><br>(103) | <b>B</b><br>(22) | <b>C</b><br>(51) | <b>D</b><br>(59) | <b>E</b><br>(76) | <b>F</b><br>(70) | <b>G</b><br>(111) | <b>H</b><br>(89) | <b>I</b><br>(84) | <b>J</b><br>(44) | <b>K</b><br>(33) | <b>L</b><br>(70) | <b>M</b><br>(77) | <b>N</b><br>(62) |
|--------------------------------|-------------------|------------------|------------------|------------------|------------------|------------------|-------------------|------------------|------------------|------------------|------------------|------------------|------------------|------------------|
| <b>Healthy Donor<br/>cfDNA</b> | <b>HD1</b>        | 0                | 0                | 0                | 0                | 0                | 0                 | 1                | 0                | 0                | 0                | 0                | 0                | 0                |
|                                | <b>HD2</b>        | 0                | 0                | 0                | 0                | 0                | 1                 | 0                | 0                | 0                | 0                | 0                | 0                | 0                |
|                                | <b>HD3</b>        | 0                | 0                | 0                | 1                | 0                | 0                 | 0                | 0                | 0                | 0                | 0                | 0                | 0                |
|                                | <b>HD4</b>        | 0                | 0                | 0                | 0                | 0                | 1                 | 0                | 0                | 0                | 0                | 0                | 0                | 0                |

**Supplementary Figure 8: Application of MRD testing to healthy donor cfDNA samples.** Patient specific panels designed for 14 different patients were pooled together and applied to cfDNA collected from four different healthy donors. Reported are the number of sites where ctDNA was detected. We required at least two sites to call a sample MRD+.
