# Supplementary material
Source: PubMed Central journal article supplement (PMC7654718)
Supplement: NIHMS1564812-supplement-12.pdf [file NIHMS1564812-supplement-12.pdf]

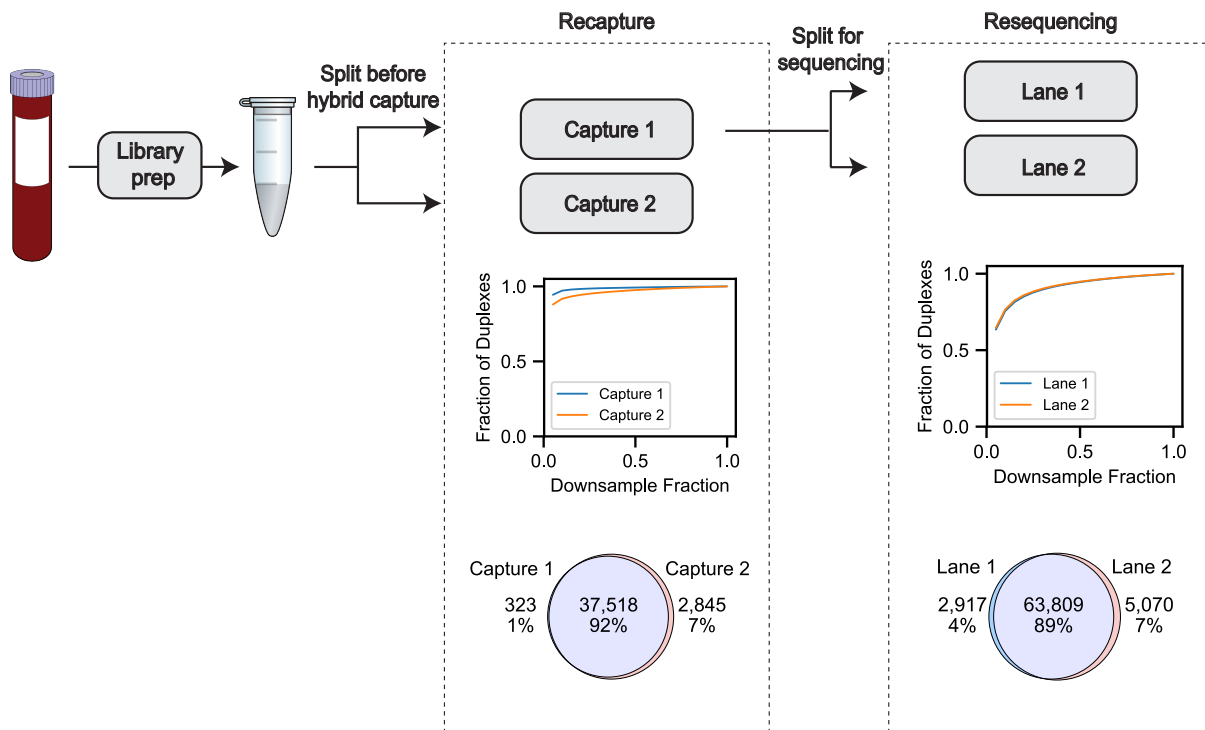

**Supplementary Figure 10: Reproducibility of patient specific MRD tests.** Consensus molecule overlap assessed for both replicate captures and replicate sequencing.
