# Supplementary material
Source: PubMed Central journal article supplement (PMC7654718)
Supplement: NIHMS1564812-supplement-14.pdf [file NIHMS1564812-supplement-14.pdf]

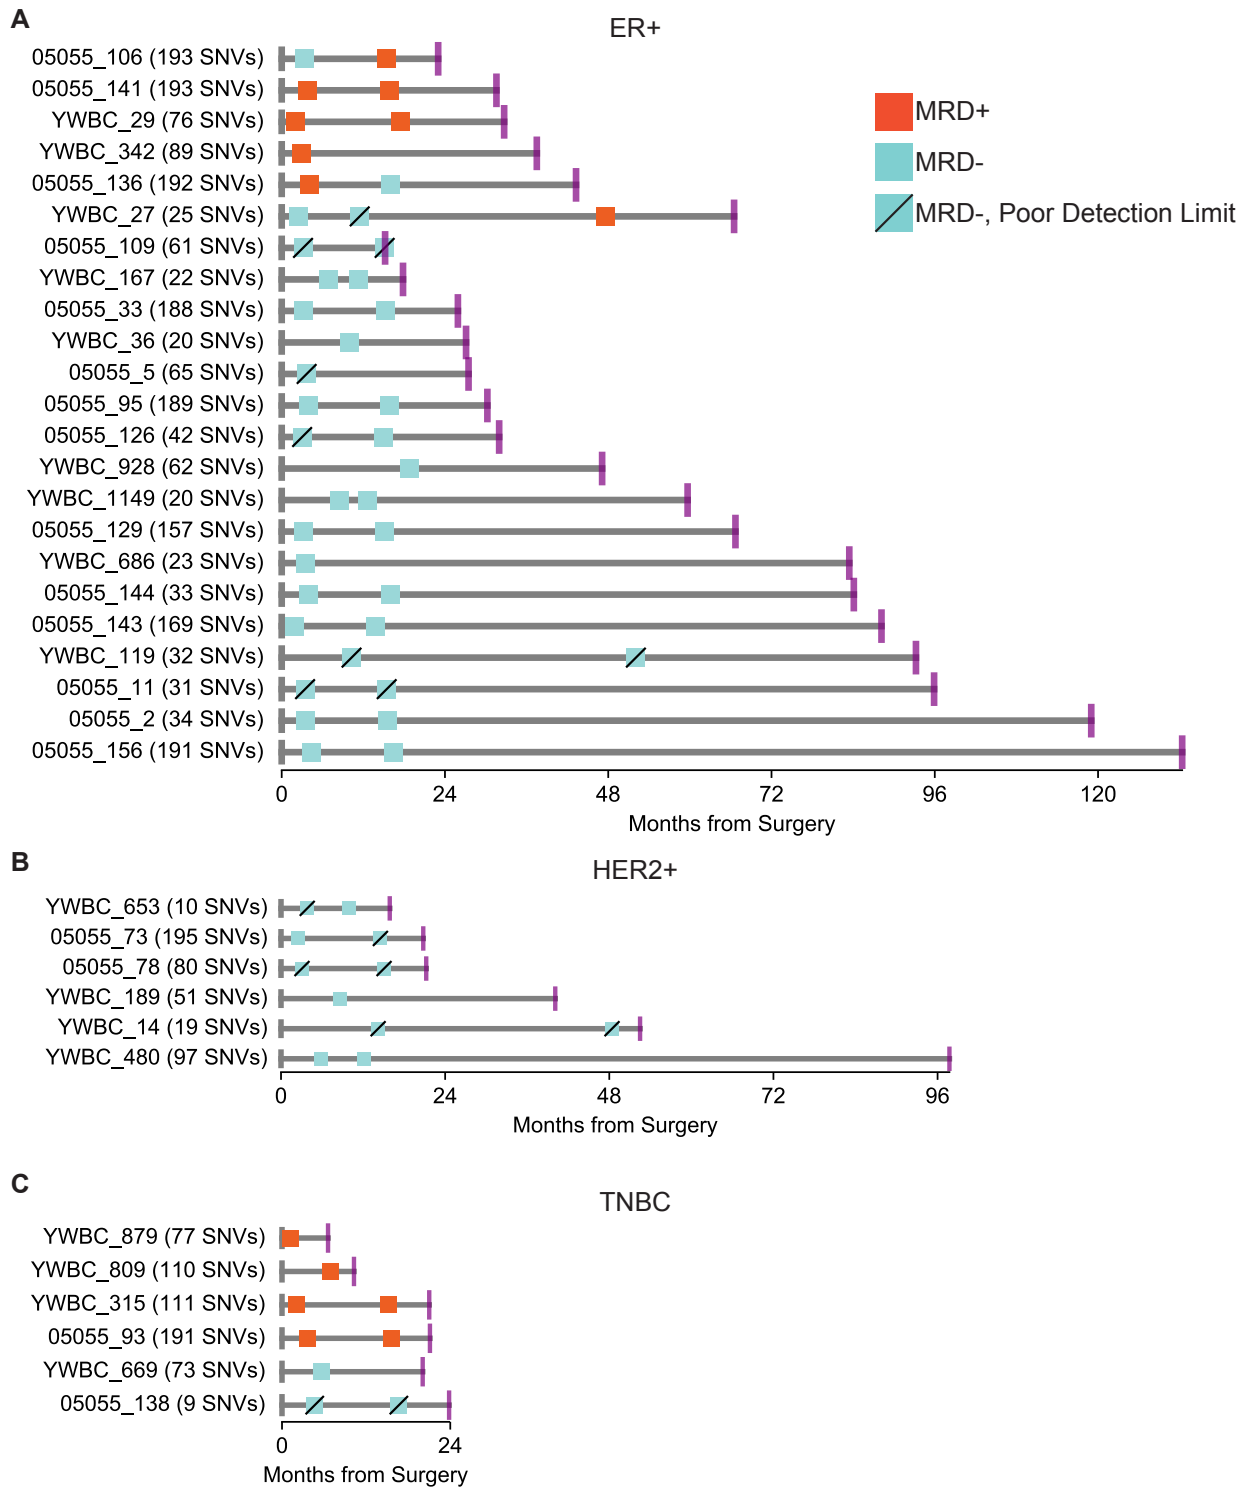

**Supplementary Figure 12: Patients who experienced distant recurrence after treatment for early stage breast cancer.** cfDNA time points for patients who ultimately experienced distant recurrence. Those marked with poor detection limits had an estimated detection limit worse than 1/1,000. End points represent time of distant clinical recurrence. Patients 05055\_81 and YWBC\_202 were excluded from this plot due to missing time of recurrence.
