# Supplementary material
Source: PubMed Central journal article supplement (PMC7654718)
Supplement: NIHMS1564812-supplement-15.pdf [file NIHMS1564812-supplement-15.pdf]

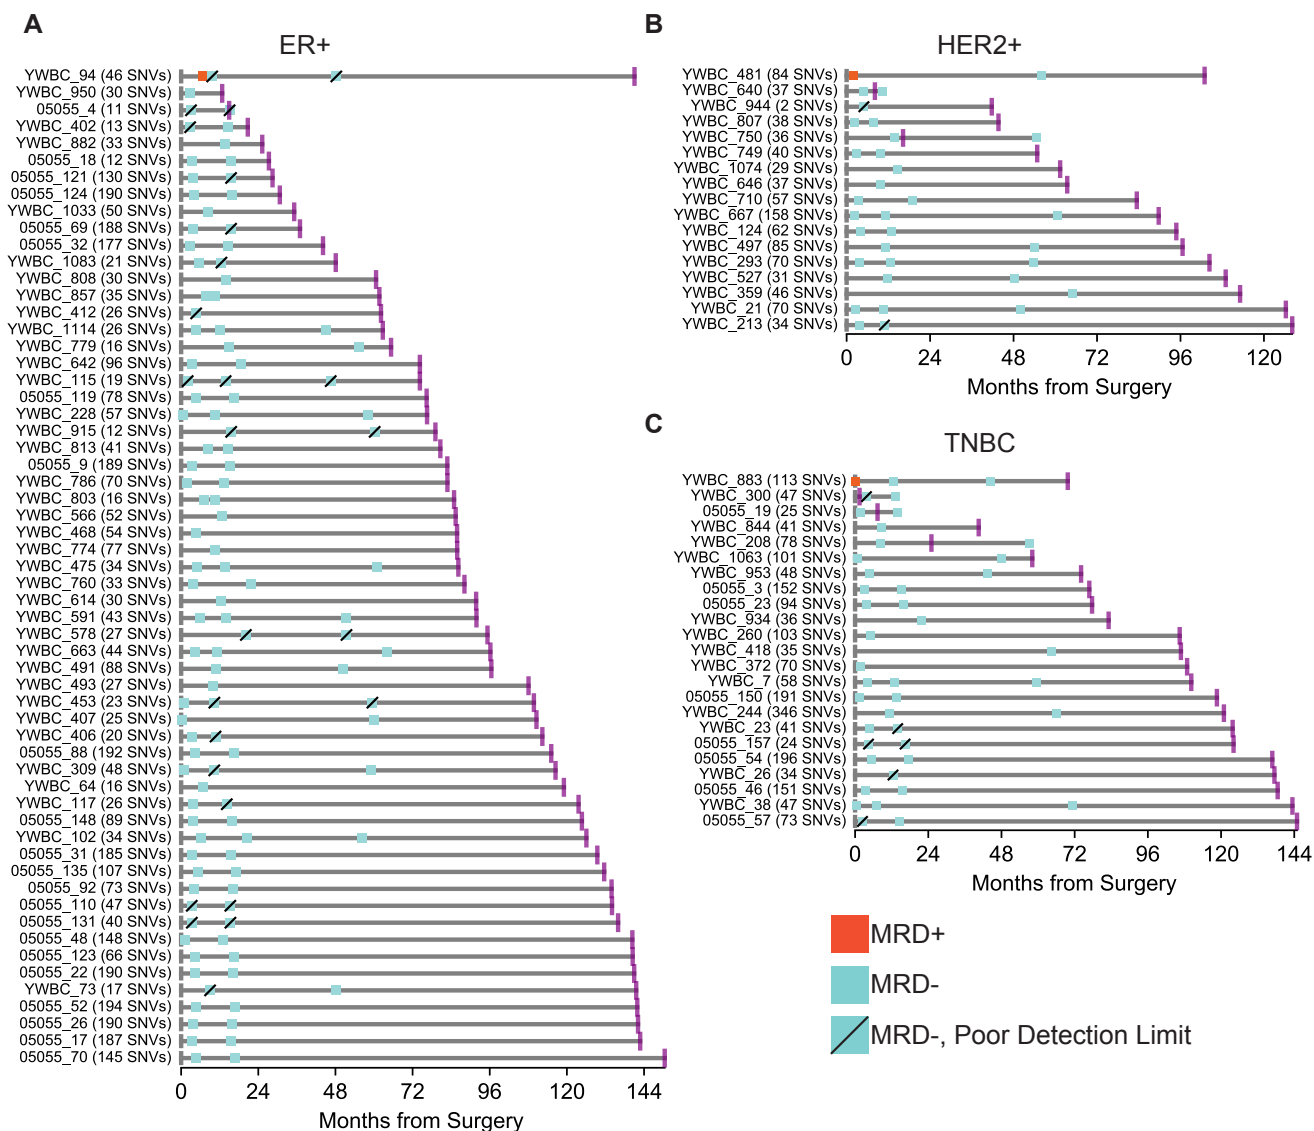

**Supplementary Figure 13: Patients who were recurrence free after treatment for early stage breast cancer.** cfDNA time points for all patients who did not experienced recurrence. Those marked with poor detection limits had an estimated detection limit worse than 1/1,000. End points represent time of last follow up or death.
