# Supplementary material
Source: PubMed Central journal article supplement (PMC7654718)
Supplement: NIHMS1564812-supplement-16.pdf [file NIHMS1564812-supplement-16.pdf]

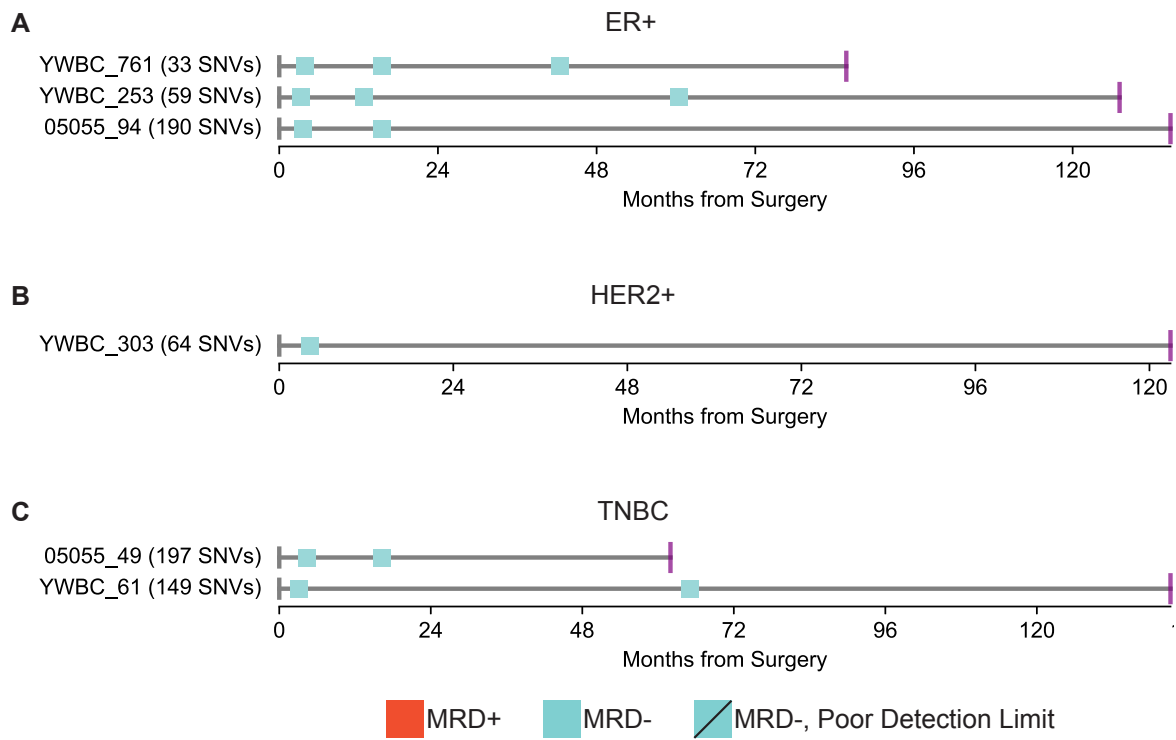

**Supplementary Figure 14: Patients who experienced local recurrence only after treatment for early stage breast cancer.** cfDNA time points for all patients who experienced local recurrence only. End points represent time of last follow up or death.
