# Supplementary material
Source: PubMed Central journal article supplement (PMC7654718)
Supplement: NIHMS1564812-supplement-17.pdf [file NIHMS1564812-supplement-17.pdf]

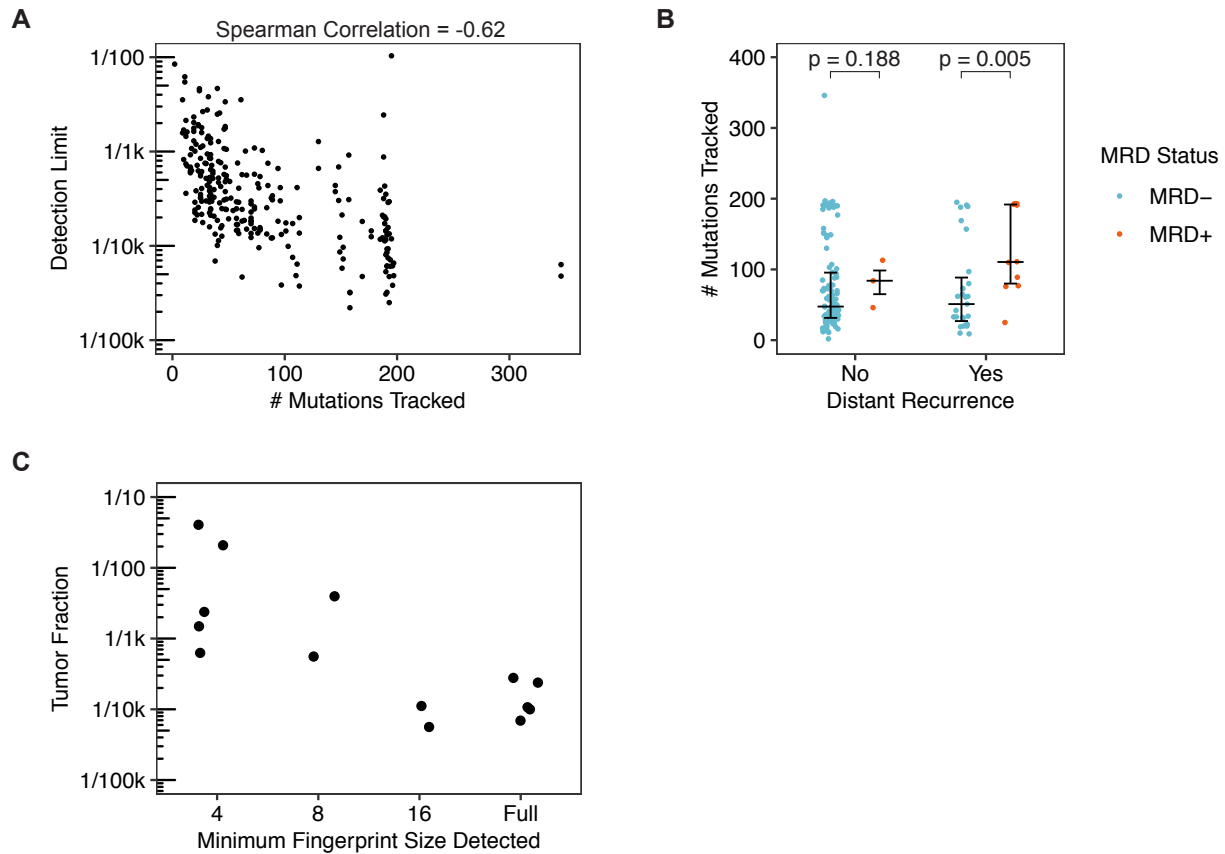

**Supplementary Figure 15: MRD testing results in early stage breast cancer cohort.** (A) Detection limits versus the number of SNVs tracked for each cfDNA sample. (B) Comparison of fingerprint size distributions between patients that were MRD+ at any time point and those that were always MRD-, split by distant recurrence status. The Mann-Whitney U test was used to determine whether MRD+ patients tracked significantly more mutations than MRD- patients. (C) Tumor fractions for MRD+ samples from patients with distant recurrence split by the minimum fingerprint size required to still detect MRD.
