# Supplementary material
Source: PubMed Central journal article supplement (PMC7654718)
Supplement: NIHMS1564812-supplement-18.pdf [file NIHMS1564812-supplement-18.pdf]

**A**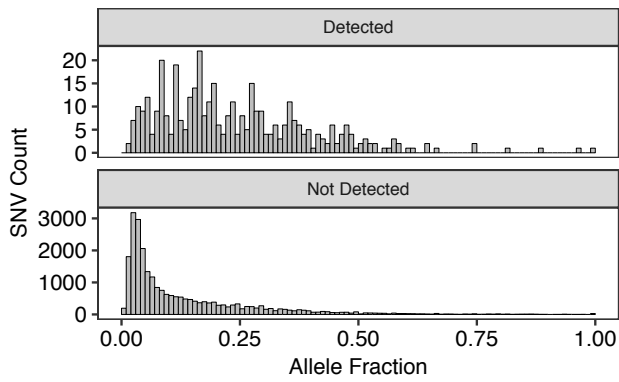**B**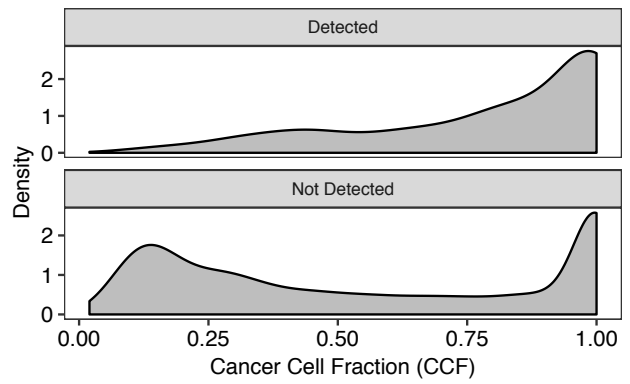

**Supplementary Figure 16: Affect of mutation abundance in tumor biopsy on MRD detection in early stage breast cancer cohort.** (A) Allele fraction histogram of all tracked mutaions and whether they were detected or not. (B) Cancer cell fraction distribution of all tracked mutations and whether they were detected or not.
